# Supplementary material
Source: HighWire-hosted journal article supplement (https://bmjopen.bmj.com/content/12/4/e054530)
Supplement: inline-supplementary-material-1 [file inline-supplementary-material-1.pdf]

Supplemental Table 1: Crude associations between sub-types of LUTS and JST-IC

| Sub-types of LUTS                 |     | JST-IC (total) |                 |          |                 |          |                 |
|-----------------------------------|-----|----------------|-----------------|----------|-----------------|----------|-----------------|
|                                   |     | Total          | p               | Males    | p               | Females  | p               |
| Frequency                         | No  | 11.8±2.7       | <b>&lt;0.01</b> | 11.8±2.7 | 0.23            | 11.8±2.6 | <b>&lt;0.01</b> |
|                                   | Yes | 11.3±2.9       |                 | 11.5±2.9 |                 | 11.0±2.9 |                 |
| Nocturia<br>(Once or more)        | No  | 11.9±2.8       | <b>0.03</b>     | 12.1±2.8 | 0.15            | 11.8±2.8 | 0.06            |
|                                   | Yes | 11.4±2.9       |                 | 11.5±2.9 |                 | 11.2±2.9 |                 |
| Nocturia<br>(Twice or more)       | No  | 11.8±2.7       | <b>&lt;0.01</b> | 12.0±2.7 | <b>&lt;0.01</b> | 11.6±2.7 | <b>&lt;0.01</b> |
|                                   | Yes | 11.1±3.0       |                 | 11.3±3.0 |                 | 10.7±3.0 |                 |
| Nocturia<br>(Three times or more) | No  | 11.6±2.8       | <b>&lt;0.01</b> | 11.9±2.8 | <b>&lt;0.01</b> | 11.4±2.8 | <b>&lt;0.01</b> |
|                                   | Yes | 10.5±2.9       |                 | 10.6±2.8 |                 | 10.0±2.9 |                 |
| Urgency                           | No  | 11.6±2.8       | <b>&lt;0.01</b> | 11.7±2.8 | <b>0.05</b>     | 11.4±2.8 | <b>&lt;0.01</b> |
|                                   | Yes | 10.7±3.1       |                 | 11.0±3.1 |                 | 10.2±3.2 |                 |
| Urinary incontinence              | No  | 11.5±2.8       | <b>0.01</b>     | 11.6±2.9 | 0.08            | 11.4±2.7 | 0.08            |
|                                   | Yes | 10.2±3.5       |                 | 10.4±2.7 |                 | 10.1±3.9 |                 |
| OAB                               | No  | 11.5±2.8       | <b>&lt;0.01</b> | 11.7±2.9 | 0.19            | 11.4±2.8 | <b>&lt;0.01</b> |
|                                   | Yes | 10.8±3.1       |                 | 11.2±2.9 |                 | 10.0±3.2 |                 |

LUTS: lower urinary tract symptom.

JST-IC: Japan Science and Technology Agency Index of Competence.

Student's t-tests were performed.
